# Supplementary material for: Multiple faces of succinate beyond metabolism in blood
Source: PubMed Central journal article supplement — Haematologica. 2018 Jun 26;103(10):1586–92. doi: 10.3324/haematol.2018.196097 (PMC6165802; doi:10.3324/haematol.2018.196097), 2018-10
Supplement: 2018_196097-Disclosures_and_Contributions.pdf [file 2018_196097-Disclosures_and_Contributions.pdf]

Haematologica  
HAEMATOL/2018/196097  
Version 3

Multiple faces of succinate beyond metabolism in blood

Franco Grimolizzi and Lorena Arranz

Disclosures: The authors declare no competing financial interests. Our work is supported by a joint meeting grant of the Northern Norway Regional Health Authority, the University Hospital of Northern Norway (UNN) and UiT The Arctic University of Norway (UiT) (2014/5668), Young Research Talent grants from the Research Council of Norway, (Stem Cell Program, 247596; FRIPRO Program, 250901), and grants from the Norwegian Cancer Society (6765150), the Northern Norway Regional Health Authority (HNF1338-17), and the Aakre-Stiftelsen Foundation (2016/9050) to L. Arranz. Correspondence and requests should be addressed to L. Arranz (e-mail: [lorena.arranz@uit.no](mailto:lorena.arranz@uit.no)).

Contributions: F. Grimolizzi and L. Arranz wrote the manuscript and designed the figures.
