# Supplementary material for: Multiple faces of succinate beyond metabolism in blood
Source: PubMed Central journal article supplement — Haematologica. 2018 Jun 26;103(10):1586–92. doi: 10.3324/haematol.2018.196097 (PMC6165802; doi:10.3324/haematol.2018.196097), 2018-10

# Effects of succinate in inflammation and hematopoiesis

## Succinate as intercellular communicator

Early sensor of homeostasis perturbations in:

- Cardiomyocytes
- Adipocytes
- Renal cells
- Blood cells

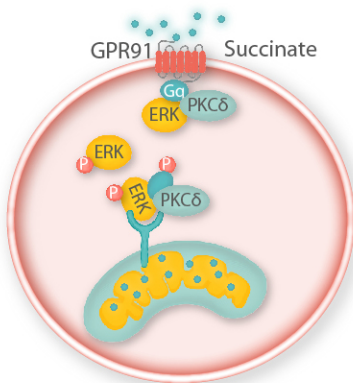

## Succinate in hematopoiesis

Proliferation of erythroid and megakaryocyte progenitors

**In vitro**

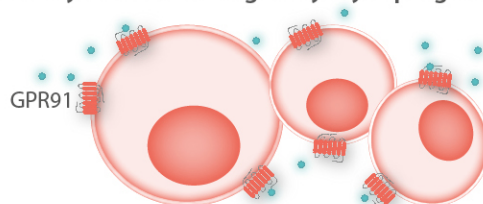

Stimulation of multilineage blood cell recovery

**In vivo**

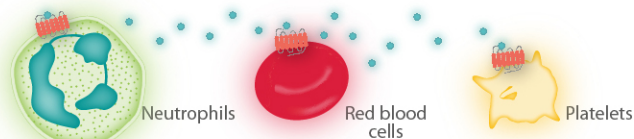

## Succinate as inflammatory signal

**Pro-inflammatory signal**

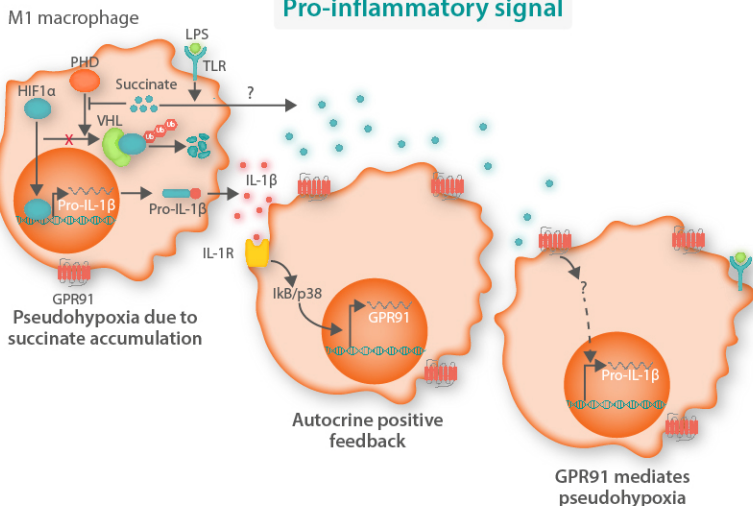

**Anti-inflammatory signal**

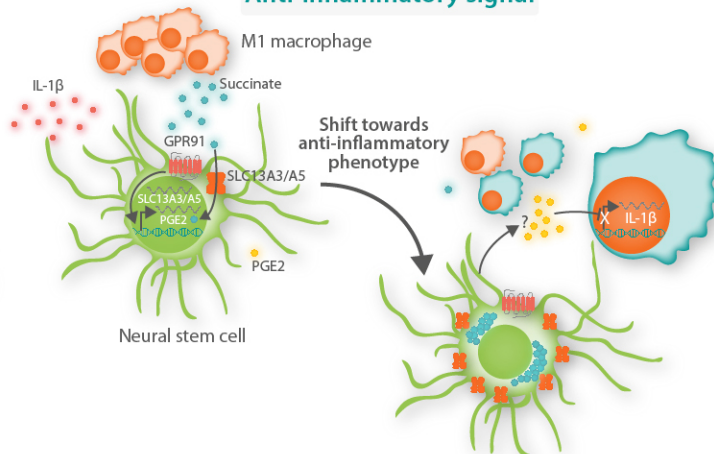

Supplement: HAEMATOL-2018-196097v3-Grimolizzi_v2-01.pdf [file HAEMATOL-2018-196097v3-Grimolizzi_v2-01.pdf]
